# Supplementary material
Source: Research Square preprint supplement (doi:10.21203/rs.3.rs-9084958/v1)
Supplement: Supplementary file 1 [file 766ca9fbd9ef3724a29ab339.docx]

**Appendix A**

**Table A1.** Measurement Items and Sources

| Construct | Code | Measurement Item | Source |
| --- | --- | --- | --- |
| Form Cues | FC1 | Fake ⟷ Natural | [Bartneck et al. (2009)](#Bartneck2009)(44) |
| FC2 | Machinelike ⟷ Humanlike |
| FC3 | Artificial ⟷ Lifelike |
| FC4 | Moving rigidly ⟷ Moving elegantly |
| Behavioral Cues | BC1 | Mechanical movement ⟷ Biological movement | [Ho & MacDorman (2017)](#Ho2017)(3) |
| BC2 | Rigid ⟷ Fluid |
| BC3 | Programmed ⟷ Naturally responsive |
| Interaction Cues | IC1 | The AI digital human advisor responded to my inputs in a timely manner. | [Liu & Shrum (2002)](#Liu2002)(45) |
| IC2 | The AI digital human advisor adjusted its responses based on my inputs. |
| IC3 | I felt that the interaction with the AI digital human advisor was two-way rather than one-sided. |
| IC4 | I was able to guide the flow of the interaction with the AI digital human advisor. |
| IC5 | The AI digital human advisor reacted appropriately to my questions or actions. |
| IC6 | The interaction with the AI digital human advisor felt smooth and continuous. |
| Social Presence | SP1 | I felt a sense of human contact during the interaction. | [Verhagen et al. (2014)](#Verhagen2014)(46) |
| SP2 | I felt a sense of interpersonal interaction with the AI digital human advisor. |
| SP3 | I felt warmth and friendliness from the AI digital human advisor. |
| Telepresence | TE1 | When interacting with the AI digital human advisor, I felt as if I were actually present in the interaction environment. | [Lombard & Ditton (1997)](#Lombard1997)(9) |
| TE2 | I had the sensation of “being there” rather than merely observing the interaction through a screen. |
| TE3 | The interaction experience made me feel as though I had entered a real advisory situation. |
| TE4 | During the interaction, the mediated environment faded away, and I felt immersed in the experience. |
| TE5 | I felt psychologically transported into the interaction scenario. |
| Brand Trust | BT1 | I believe that the financial brand represented by the AI digital human advisor is reliable. | [McKnight et al. (2002)](#McKnight2002); [Dagger et al. (2007)](#Dagger2007)(5, 47) |
| BT2 | I believe that this brand is capable of providing professional and high-quality financial services. |
| BT3 | I believe that the information provided by this brand through the AI digital human advisor is trustworthy. |
| BT4 | I believe that this brand will act in my best interests. |

**Table A2.** Descriptive Statistics

| Construct | N | Min | Max | Mean | SD | Skewness | Kurtosis |
| --- | --- | --- | --- | --- | --- | --- | --- |
| Form Cues | 487 | 1.25 | 7.00 | 4.949 | 1.278 | −0.575 | −0.470 |
| Behavioral Cues | 487 | 1.00 | 7.00 | 4.779 | 1.349 | −0.603 | −0.375 |
| Interaction Cues | 487 | 1.33 | 7.00 | 5.086 | 1.238 | −0.671 | −0.487 |
| Social Presence | 487 | 1.00 | 7.00 | 4.882 | 1.427 | −0.627 | −0.526 |
| Telepresence | 487 | 1.20 | 7.00 | 5.007 | 1.260 | −0.560 | −0.343 |
| Brand Trust | 487 | 1.25 | 7.00 | 5.196 | 1.270 | −0.811 | −0.156 |

Note. N = 487. All items were measured using a seven-point Likert scale (1 = strongly disagree, 7 = strongly agree). Skewness and kurtosis values fall within acceptable ranges, indicating no serious deviations from normality.
